# Supplementary material for: USP11 mediates repair of DNA–protein cross-links by deubiquitinating SPRTN metalloprotease
Source: PubMed Central journal article supplement (PMC7960550; doi:10.1016/j.jbc.2021.100396), 2021-02-07

POLD3 Peptide Spectrum  
 sp|Q15054|DPOD3\_HUMAN

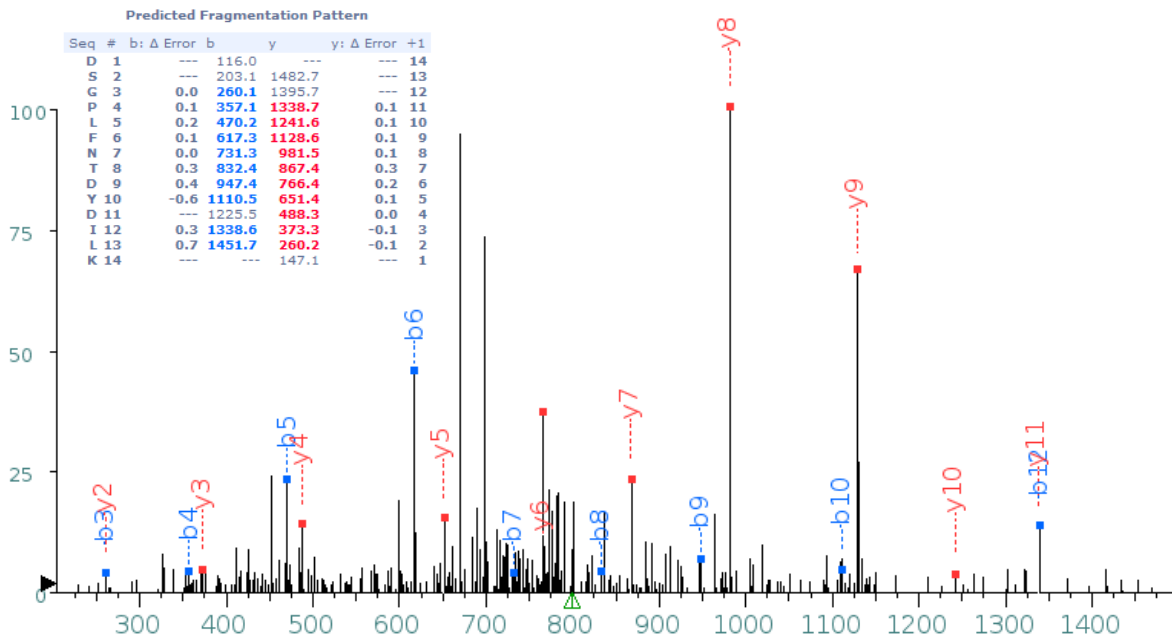

USP11 Peptide Spectrum  
 sp|P51784|UBP11\_HUMAN

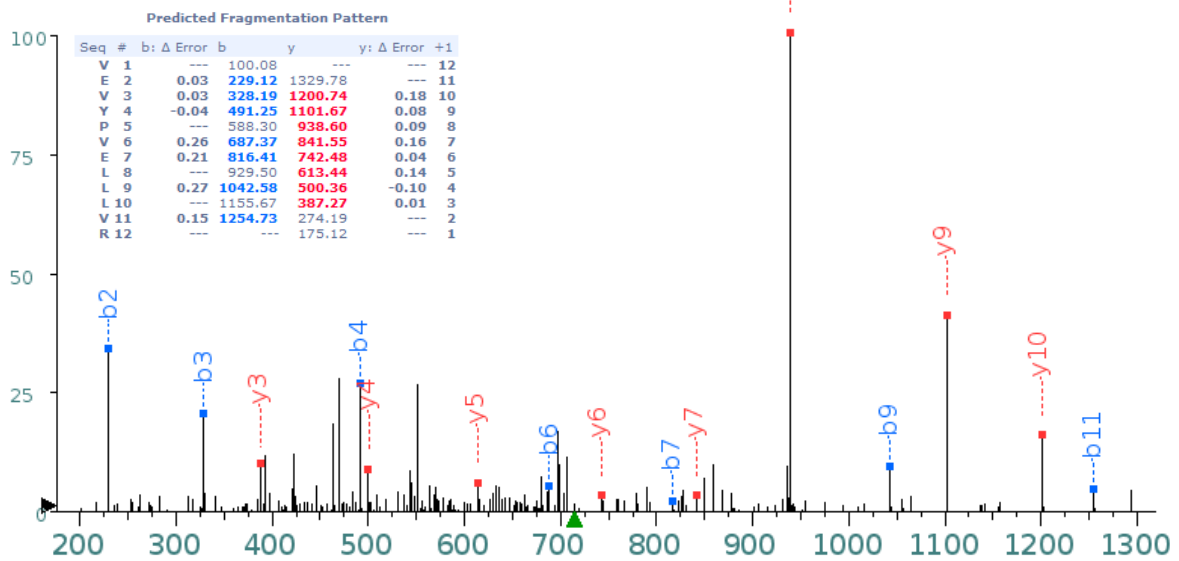

Supplement: mmc3.pdf [file mmc3.pdf]
